# Supplementary material
Source: HighWire-hosted journal article supplement (https://jnm.snmjournals.org/highwire/filestream/94556/field_highwire_adjunct_files/0/125328_Supplemental_Data.pdf)
Supplement: 125328_Supplemental_Data.pdf [file 125328_Supplemental_Data.pdf]

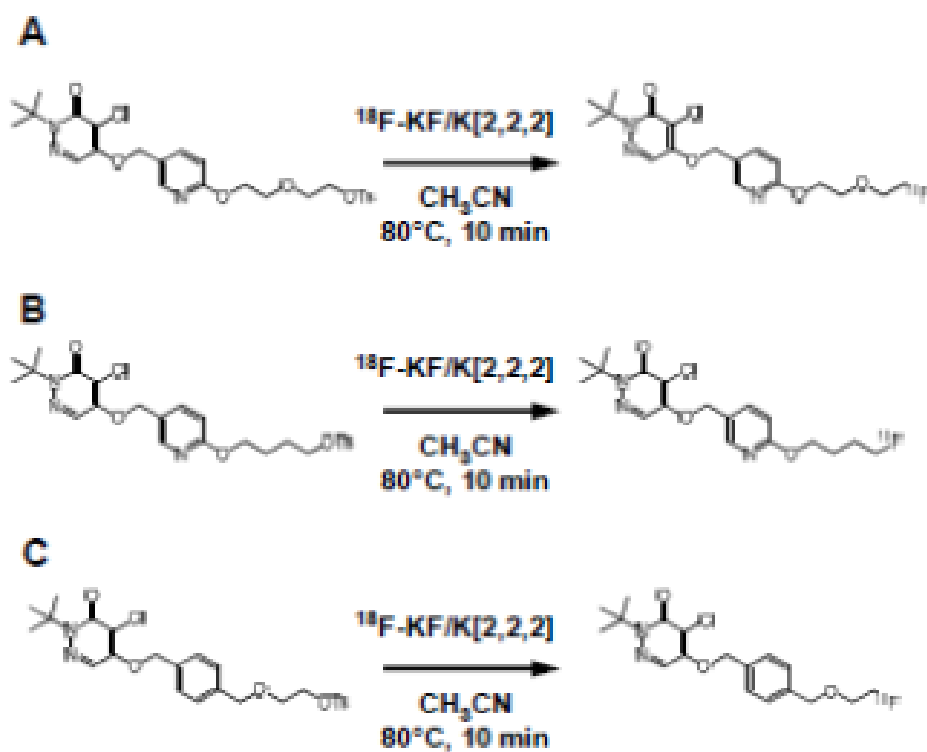

Supplemental Figure 1. Radiolabeling of  $^{18}\text{F}$ -BCPP-EF (A),  $^{18}\text{F}$ -BCPP-BF (B), and  $^{18}\text{F}$ -BMS (C). Syntheses of precursors and standard compounds of  $^{18}\text{F}$ -BCPP-EF and  $^{18}\text{F}$ -BCPP-BF were conducted according to a previous report (19).

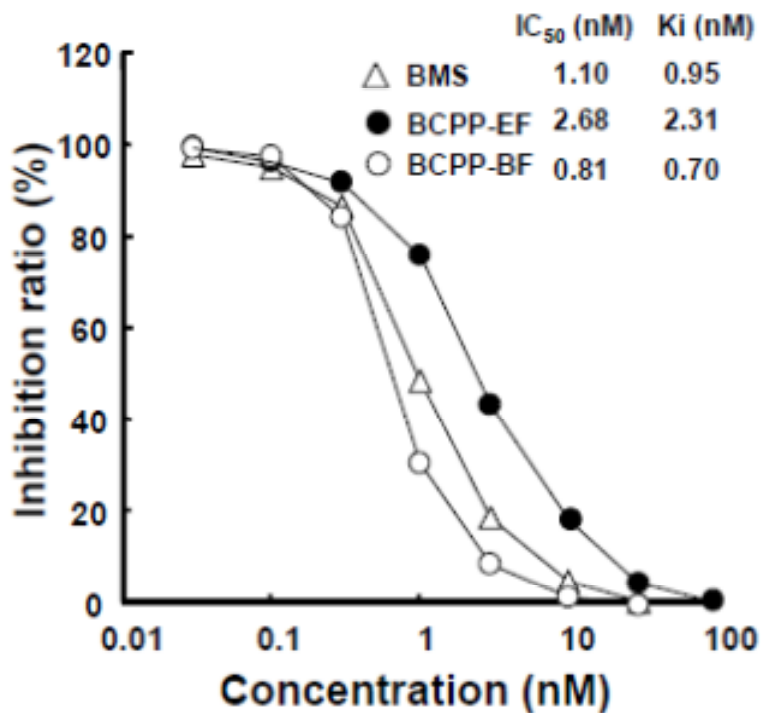

Supplemental Figure 2. Inhibition of specific binding of <sup>3</sup>H-dihydrorotenone by BCPP-EF, BCPP-BF, and BMS in bovine cardiomyocyte submitochondrial particles (SMP). Specific binding of <sup>3</sup>H-dihydrorotenone at each point was plotted against concentrations of each test compound to determine the 50% inhibition (IC<sub>50</sub>) values, which were converted to the inhibition constant (Ki).

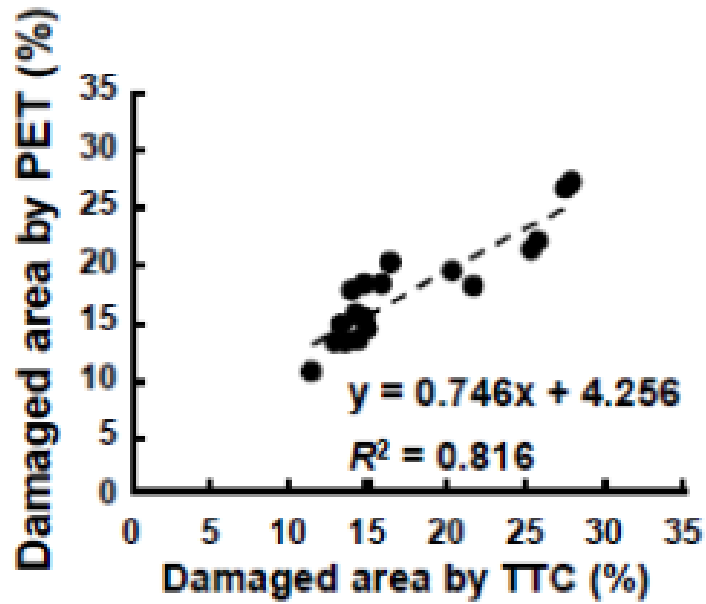

Supplemental Figure 3. Correlation analysis between the damaged areas determined by TTC staining and  $^{18}\text{F}$ -BCPP-EF in the rat brains of PIT model. Brains were dissected at Day 1 for TTC staining after PET imaging with  $^{18}\text{F}$ -BCPP-EF, and damaged areas detected by both methods were plotted.
